# Supplementary material for: Nematicidal Metabolites from the Actinomycete Micromonospora sp. WH06
Source: MDPI journal article supplement (doi:10.3390/microorganisms10112274), 2022-11-16
Supplement: s1 [file s1]

Supplementary Materials for

**Nematicidal Metabolites from the Actinomycete  
*Micromonospora* sp. WH06**

**Yuan Ran, Yu Zhang, Xin Wang\* and Guohong Li\***

State Key Laboratory for Conservation and Utilization of Bio-Resources in Yunnan, and Key  
Laboratory for Southwest Microbial Diversity of the Ministry of Education, Yunnan  
University, Kunming, 650091, China

\* Correspondence: ligh@ynu.edu.cn (L.G.)

**Table S1.** Effects of compounds (**1**, **4**, **9**, and **10**) on the egg hatching of *M. incognita*.

| Compounds     | Hatched worms per egg mass $\pm$ SD |                  |                  |
|---------------|-------------------------------------|------------------|------------------|
|               | 24h                                 | 48h              | 72h              |
| ( <b>1</b> )  | 8.00 $\pm$ 2.65                     | 10.00 $\pm$ 2.64 | 17.33 $\pm$ 5.86 |
| ( <b>4</b> )* | 2.33 $\pm$ 2.91                     | 4.34 $\pm$ 1.00  | 7.01 $\pm$ 5.57  |
| ( <b>9</b> )  | 7.00 $\pm$ 4.24                     | 38.50 $\pm$ 4.95 | 39.50 $\pm$ 4.95 |
| ( <b>10</b> ) | 19.33 $\pm$ 4.24                    | 42.67 $\pm$ 9.29 | 60.33 $\pm$ 4.51 |
| Control       | 18.71 $\pm$ 3.61                    | 43.40 $\pm$ 4.75 | 59.80 $\pm$ 6.50 |

\* Mean  $\pm$  SD of 6 replicates
